# Supplementary material
Source: publisher figshare collection journal article supplement (https://tandf.figshare.com/articles/dataset/_/3573552)

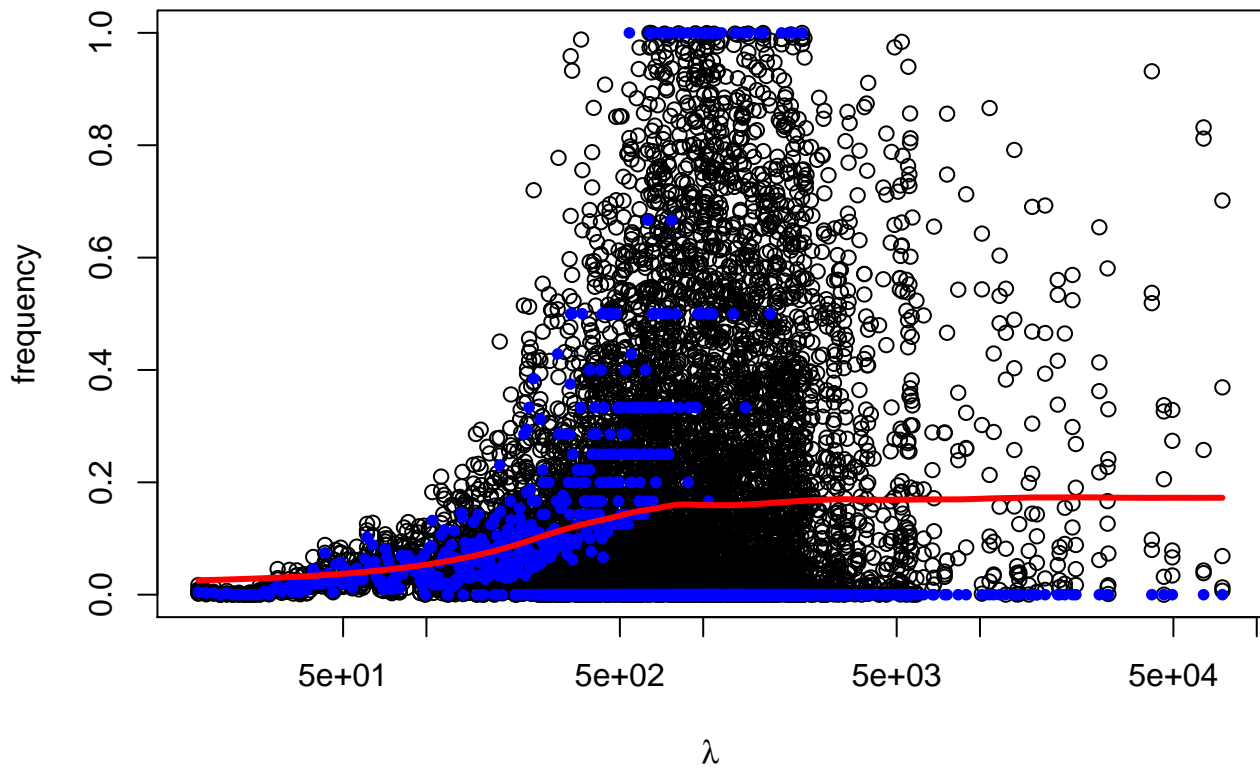

Supplement: Supplementary file 1 [file 1]

# sRNAs

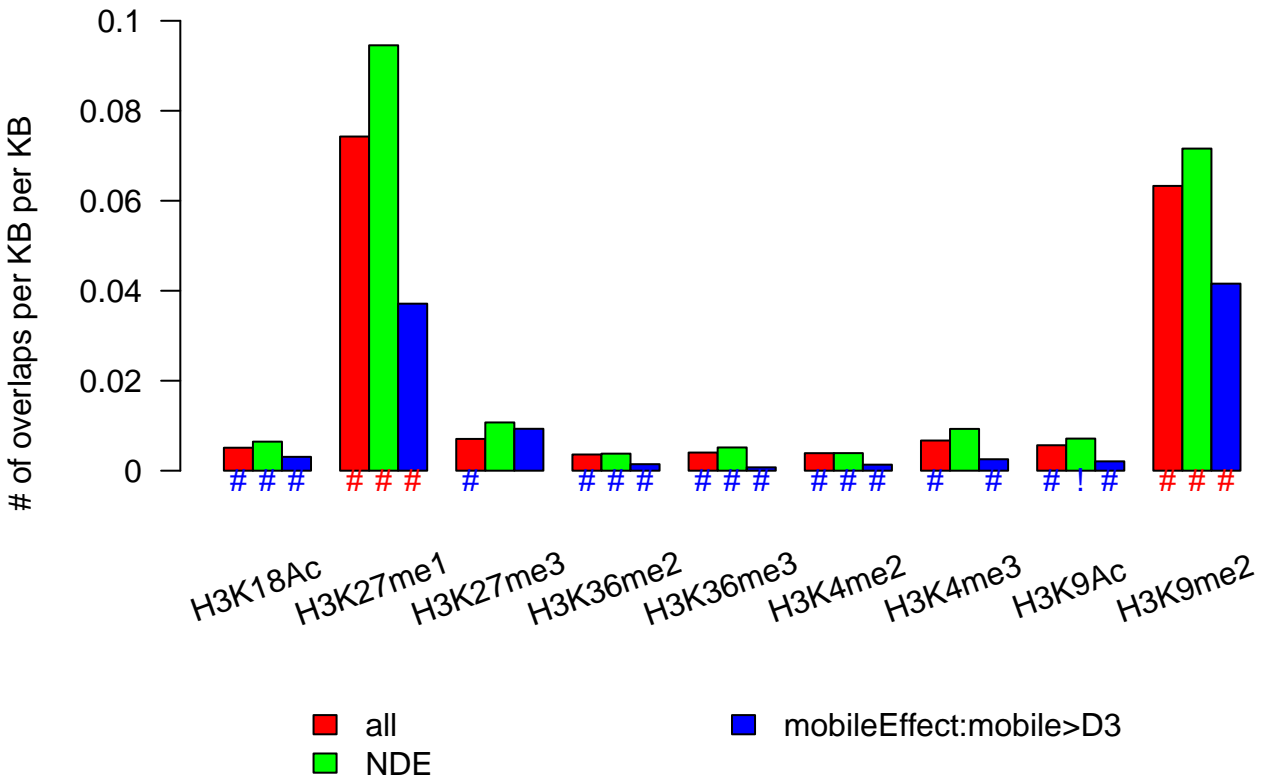

Supplement: Supplementary file 2 [file 1]

Inter-locus ( $\log_{10}$ ) distances

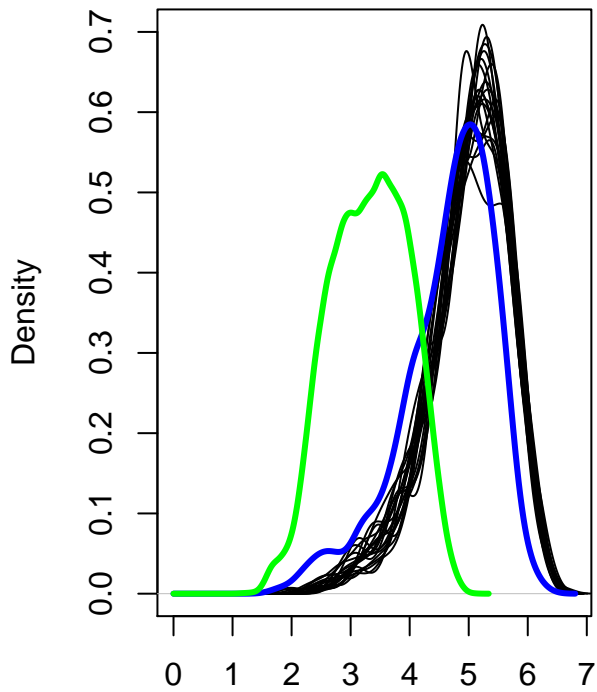

( $\log_{10}$ ) locus widths

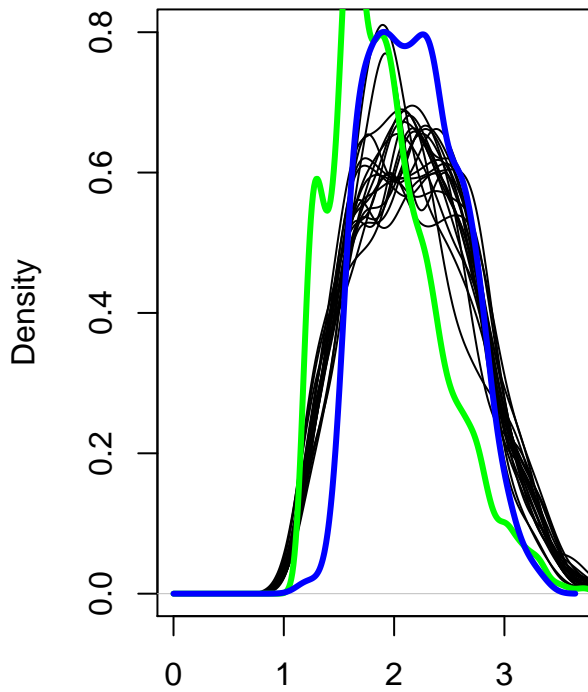

Supplement: Supplementary file 3 [file 1]
